# Supplementary material for: Prenatal Choline Supplement in a Maternal Obesity Model Modulates Offspring Hepatic Lipidomes
Source: MDPI journal article supplement (doi:10.3390/nu15040965), 2023-02-15
Supplement: s1 [file s1]

Supplementary Table S2. Abundance of lipid species in the E17.5 fetal liver

| Lipid species       | HFCO <sup>a</sup> | HFCS <sup>a</sup> | FDR adjusted <i>p</i><br>value <sup>b</sup> |
|---------------------|-------------------|-------------------|---------------------------------------------|
| PC 32:1             | 0.25              | 0.33              | 0.005                                       |
| PE 32:1             | 0.23              | 0.36              | 0.005                                       |
| PE 38:1, PE O-40:8  | 1.29              | 4.01              | 0.005                                       |
| PE O-38:6           | 1.82              | 4.05              | 0.026                                       |
| PE 40:8, PE O-40:1  | 1.94              | 3.90              | 0.033                                       |
| PE 42:7, PE O-42:0  | 3.13              | 3.37              | 0.033                                       |
| PE O-40:5           | 1.02              | 3.28              | 0.033                                       |
| PE O-42:5           | 1.30              | 3.69              | 0.033                                       |
| PC O-42:11          | 0.28              | 0.36              | 0.043                                       |
| PA O-42:6           | 3.13              | 3.16              | 0.051                                       |
| PC 40:4             | 0.28              | 0.43              | 0.051                                       |
| PE 34:1             | 0.29              | 0.80              | 0.051                                       |
| PE O-42:10          | 1.19              | 3.35              | 0.051                                       |
| PE O-34:2           | 1.43              | 3.48              | 0.066                                       |
| PE O-40:6           | 2.51              | 3.43              | 0.066                                       |
| PE 34:3             | 0.28              | 0.57              | 0.072                                       |
| PE 34:4             | 0.29              | 0.64              | 0.072                                       |
| PE O-42:8           | 1.49              | 3.45              | 0.072                                       |
| PE 42:8, PE O-42:1  | 2.27              | 3.43              | 0.073                                       |
| PS 36:4             | 0.76              | 0.30              | 0.073                                       |
| PS 32:1             | 0.35              | 0.33              | 0.076                                       |
| LPC 22:0            | 0.75              | 2.48              | 0.078                                       |
| PC 32:2             | 0.29              | 0.54              | 0.082                                       |
| PE O-40:4           | 1.46              | 3.31              | 0.090                                       |
| PS O-40:5           | 3.37              | 2.04              | 0.090                                       |
| PE O-42:11          | 1.75              | 3.32              | 0.104                                       |
| PS 38:5             | 0.59              | 0.30              | 0.104                                       |
| PE 42:9, PE O-42:2  | 1.63              | 3.29              | 0.104                                       |
| PE 42:5             | 2.33              | 3.15              | 0.112                                       |
| PC O-32:1           | 0.31              | 0.66              | 0.117                                       |
| PE 40:1             | 1.25              | 3.03              | 0.117                                       |
| PE 40:4             | 1.64              | 3.23              | 0.117                                       |
| PE 40:5             | 0.45              | 1.40              | 0.117                                       |
| PE O-42:6           | 1.91              | 3.21              | 0.121                                       |
| PE 40:7, PE O-40:0  | 2.18              | 3.09              | 0.134                                       |
| PE O-42:9           | 1.48              | 3.10              | 0.137                                       |
| PG 34:1             | 0.52              | 0.32              | 0.137                                       |
| PE 42:10, PE O-42:3 | 1.20              | 2.91              | 0.142                                       |
| PI 40:5             | 0.32              | 0.52              | 0.142                                       |

|                     |      |      |       |
|---------------------|------|------|-------|
| PA O-42:5           | 3.02 | 1.42 | 0.142 |
| PC 38:0, PC O-40:7  | 0.54 | 0.32 | 0.142 |
| PS 36:2             | 3.09 | 1.90 | 0.142 |
| PE O-40:3           | 2.09 | 3.00 | 0.153 |
| PS 42:11, PS O-42:4 | 1.89 | 3.05 | 0.153 |
| PA 36:4             | 0.36 | 0.42 | 0.153 |
| PC 40:8, PC O-40:1  | 2.82 | 2.34 | 0.153 |
| PE 36:1             | 0.82 | 2.33 | 0.153 |
| PE O-34:6           | 2.44 | 2.76 | 0.153 |
| PE O-42:7           | 1.85 | 3.04 | 0.153 |
| LPI 18:0            | 1.03 | 0.39 | 0.163 |
| PC 36:6             | 0.76 | 2.18 | 0.165 |
| PE 36:0, PE O-38:7  | 0.91 | 2.44 | 0.165 |
| PS 38:4             | 1.12 | 0.41 | 0.165 |
| LPI 20:4            | 0.99 | 0.39 | 0.166 |
| LPC 22:5            | 0.51 | 0.34 | 0.171 |
| PC O-34:2           | 2.24 | 2.75 | 0.183 |
| PE 32:2             | 0.35 | 0.55 | 0.194 |
| PI 36:5             | 0.42 | 0.40 | 0.225 |
| PS 38:3             | 1.39 | 0.50 | 0.225 |
| PC 30:1             | 0.36 | 0.61 | 0.230 |
| PC O-38:5           | 1.15 | 0.45 | 0.241 |
| PS 38:6             | 1.21 | 0.46 | 0.241 |
| PG 34:0, PG O-36:7  | 0.61 | 0.36 | 0.249 |
| LPE 16:1            | 0.54 | 0.37 | 0.262 |
| PE 40:0             | 1.72 | 2.73 | 0.262 |
| PE 36:2             | 1.10 | 2.44 | 0.302 |
| PE O-32:0           | 0.90 | 2.20 | 0.303 |
| PE 32:0             | 0.39 | 0.72 | 0.321 |
| PG 36:5             | 0.45 | 0.42 | 0.321 |
| PI 34:0, PI O-36:7  | 0.89 | 0.41 | 0.321 |
| PC O-36:5           | 1.17 | 2.46 | 0.322 |
| PC O-38:4           | 1.87 | 0.73 | 0.323 |
| PE O-32:1           | 0.39 | 0.74 | 0.325 |
| PC 38:1, PC O-40:8  | 0.52 | 1.31 | 0.338 |
| PC O-34:5           | 1.57 | 2.57 | 0.338 |
| PE O-34:1           | 0.42 | 0.89 | 0.338 |
| PE O-36:3           | 1.11 | 2.37 | 0.338 |
| PS 40:6             | 1.22 | 0.50 | 0.342 |
| LPC 16:1            | 0.59 | 0.40 | 0.346 |
| PS 34:2             | 2.01 | 0.83 | 0.346 |
| PC 34:0, PC O-36:7  | 0.40 | 0.65 | 0.357 |
| PC 36:0, PC O-38:7  | 0.42 | 0.50 | 0.357 |

|                    |      |      |       |
|--------------------|------|------|-------|
| PE 42:6            | 1.71 | 2.50 | 0.357 |
| LPC O-22:6         | 0.62 | 0.40 | 0.359 |
| PE 38:2, PE O-40:9 | 1.08 | 2.29 | 0.359 |
| PC O-30:3          | 1.25 | 0.52 | 0.377 |
| PE 34:0, PE O-36:7 | 0.57 | 1.38 | 0.377 |
| PI 38:3            | 0.45 | 0.48 | 0.384 |
| PS 36:3            | 1.65 | 0.68 | 0.384 |
| PE 42:1            | 0.65 | 1.58 | 0.397 |
| PI 38:2, PI O-40:9 | 0.44 | 0.49 | 0.397 |
| PC O-38:6          | 0.43 | 0.83 | 0.398 |
| PA 40:6            | 1.81 | 2.33 | 0.408 |
| PC O-38:3          | 2.33 | 1.30 | 0.408 |
| PE O-36:1          | 0.71 | 1.69 | 0.408 |
| PG 36:1            | 0.60 | 0.42 | 0.408 |
| PG 36:2            | 2.39 | 1.46 | 0.408 |
| PS 38:0, PS O-40:7 | 1.80 | 2.34 | 0.408 |
| PS 40:7, PS O-40:0 | 0.62 | 0.42 | 0.408 |
| LPC 18:1           | 0.70 | 0.43 | 0.409 |
| LPC 20:3           | 0.84 | 0.45 | 0.409 |
| LPC 22:6           | 1.17 | 0.52 | 0.409 |
| LPE 22:3           | 0.64 | 0.43 | 0.409 |
| PC O-34:6          | 1.45 | 2.34 | 0.409 |
| PE O-36:6          | 1.73 | 2.31 | 0.409 |
| PG 38:5            | 2.06 | 2.11 | 0.409 |
| PS 34:1            | 0.59 | 0.43 | 0.409 |
| PS 40:4            | 0.45 | 0.50 | 0.409 |
| PS O-36:2          | 2.33 | 1.67 | 0.409 |
| PS O-42:11         | 0.45 | 0.50 | 0.409 |
| PE 40:9, PE O-40:2 | 1.89 | 2.20 | 0.422 |
| PE O-38:2          | 1.33 | 2.28 | 0.422 |
| PE 40:3            | 1.07 | 2.12 | 0.424 |
| PS O-38:4          | 1.51 | 0.66 | 0.424 |
| LPC 20:4           | 1.37 | 0.61 | 0.436 |
| PE 36:3            | 1.41 | 2.27 | 0.436 |
| PE 42:4            | 1.84 | 2.18 | 0.437 |
| PE 38:0, PE O-40:7 | 0.89 | 1.89 | 0.450 |
| LPC 20:5           | 0.96 | 0.49 | 0.459 |
| PE 42:3            | 1.86 | 2.12 | 0.459 |
| PC 34:4            | 0.45 | 0.72 | 0.461 |
| PE O-38:1          | 1.12 | 2.09 | 0.468 |
| PG 34:4            | 0.56 | 0.47 | 0.474 |
| LPC 18:3           | 0.95 | 0.50 | 0.501 |
| LPC 22:4           | 0.92 | 0.50 | 0.501 |

|                     |      |      |       |
|---------------------|------|------|-------|
| LPE 20:4            | 1.31 | 0.62 | 0.501 |
| LPE O-18:0          | 1.91 | 1.99 | 0.501 |
| PC O-32:5           | 0.85 | 1.76 | 0.501 |
| PE 40:6             | 1.52 | 2.14 | 0.501 |
| PI 36:4             | 0.57 | 0.48 | 0.501 |
| PS 40:8, PS O-40:1  | 1.28 | 0.60 | 0.501 |
| PS 42:7, PS O-42:0  | 0.47 | 0.65 | 0.501 |
| PS O-40:6           | 1.56 | 2.16 | 0.501 |
| PC 42:7, PC O-42:0  | 1.70 | 2.07 | 0.515 |
| LPE 18:1            | 0.82 | 0.49 | 0.526 |
| PC O-40:6           | 0.63 | 0.48 | 0.526 |
| PI 36:1             | 0.55 | 0.51 | 0.526 |
| PC O-36:4           | 1.43 | 0.68 | 0.539 |
| PC O-40:5           | 1.41 | 2.06 | 0.561 |
| PS 36:5             | 0.95 | 0.52 | 0.561 |
| PE 30:0             | 0.50 | 0.80 | 0.571 |
| LPC 18:2            | 1.69 | 0.86 | 0.578 |
| PC 38:3             | 1.94 | 1.69 | 0.599 |
| PC 40:1             | 0.97 | 1.80 | 0.599 |
| PC O-36:3           | 2.00 | 1.33 | 0.599 |
| LPC 22:3            | 0.84 | 0.52 | 0.605 |
| LPE 18:2            | 1.88 | 1.10 | 0.605 |
| PC 34:2             | 1.88 | 1.73 | 0.605 |
| PE 40:2             | 1.06 | 1.86 | 0.605 |
| PI 34:1             | 0.66 | 0.51 | 0.605 |
| PS O-42:5           | 1.99 | 1.40 | 0.605 |
| PC O-30:0           | 1.08 | 1.87 | 0.607 |
| PI 36:3             | 0.59 | 0.54 | 0.621 |
| PE 36:5             | 0.56 | 0.56 | 0.625 |
| LPE O-22:0          | 1.93 | 1.33 | 0.638 |
| LPS 18:1            | 0.94 | 0.55 | 0.641 |
| PC 36:2             | 1.67 | 1.84 | 0.641 |
| PE O-38:5           | 0.54 | 0.85 | 0.665 |
| LPE 22:5            | 0.83 | 0.54 | 0.666 |
| LPE 22:0            | 1.35 | 1.88 | 0.675 |
| PC O-42:6           | 0.61 | 1.10 | 0.675 |
| PE 32:3             | 0.75 | 1.42 | 0.675 |
| LPC O-22:0          | 0.54 | 0.65 | 0.681 |
| LPC 16:0            | 0.93 | 0.56 | 0.683 |
| PC 42:10, PC O-42:3 | 1.50 | 0.82 | 0.695 |
| PC O-32:0           | 0.90 | 1.60 | 0.695 |
| PE 34:2             | 0.60 | 1.03 | 0.695 |
| PE O-38:3           | 0.95 | 1.65 | 0.695 |

|                    |      |      |       |
|--------------------|------|------|-------|
| LPE 18:0           | 0.75 | 0.55 | 0.701 |
| PS O-40:3          | 1.55 | 1.78 | 0.707 |
| PC 30:0            | 0.91 | 1.60 | 0.707 |
| LPC O-18:1         | 0.94 | 0.59 | 0.709 |
| PC 42:6            | 1.79 | 1.44 | 0.709 |
| PE 36:6            | 0.82 | 1.47 | 0.709 |
| PE O-36:0          | 0.60 | 0.60 | 0.709 |
| PG 34:2            | 1.40 | 0.78 | 0.709 |
| PI 38:5            | 0.63 | 0.57 | 0.709 |
| PI 40:4            | 0.56 | 0.80 | 0.709 |
| PS 42:2            | 1.16 | 1.76 | 0.709 |
| PC 42:0            | 0.84 | 1.47 | 0.713 |
| LPS 18:0           | 1.01 | 0.61 | 0.719 |
| LPE 20:3           | 0.96 | 0.60 | 0.731 |
| PC O-36:0          | 0.60 | 0.96 | 0.732 |
| LPC 18:0           | 1.09 | 0.65 | 0.743 |
| PC O-40:4          | 0.65 | 0.60 | 0.743 |
| PE O-36:2          | 1.01 | 1.63 | 0.743 |
| PI 38:6            | 0.58 | 0.74 | 0.743 |
| PC 38:4            | 1.70 | 1.47 | 0.743 |
| PC 34:1            | 0.59 | 0.71 | 0.751 |
| PE 30:1            | 0.69 | 1.18 | 0.751 |
| PI O-42:11         | 0.58 | 0.80 | 0.751 |
| PC O-42:7          | 0.80 | 1.36 | 0.757 |
| PC 40:3            | 0.67 | 1.07 | 0.801 |
| PC 36:5            | 0.70 | 0.62 | 0.819 |
| LPE 22:6           | 1.50 | 0.96 | 0.823 |
| PA 40:7, PA O-40:0 | 1.60 | 1.45 | 0.823 |
| PS 42:9, PS O-42:2 | 1.43 | 0.90 | 0.829 |
| PC 36:3            | 1.54 | 1.46 | 0.855 |
| PE O-38:4          | 1.52 | 1.49 | 0.855 |
| LPC O-18:0         | 1.41 | 0.90 | 0.858 |
| PC 42:9, PC O-42:2 | 0.66 | 0.68 | 0.858 |
| PC O-42:10         | 0.65 | 0.69 | 0.858 |
| PC 32:0            | 0.74 | 1.16 | 0.858 |
| PC 40:5            | 0.71 | 0.65 | 0.864 |
| PE 38:7            | 1.25 | 1.57 | 0.864 |
| PG 40:6            | 1.12 | 0.72 | 0.864 |
| PC O-38:2          | 1.56 | 1.25 | 0.866 |
| PE 38:6            | 1.39 | 1.53 | 0.866 |
| PI 40:6            | 0.72 | 1.09 | 0.873 |
| PC 32:3            | 0.80 | 1.24 | 0.876 |
| PC 36:1            | 0.68 | 0.97 | 0.876 |

|                    |      |      |       |
|--------------------|------|------|-------|
| PS 40:5            | 1.09 | 0.73 | 0.897 |
| PC O-42:8          | 0.87 | 1.31 | 0.901 |
| PS O-36:1          | 1.44 | 1.00 | 0.901 |
| PC O-34:1          | 0.66 | 0.83 | 0.902 |
| PG 36:4            | 0.82 | 1.23 | 0.909 |
| PS 42:0            | 1.00 | 1.41 | 0.911 |
| PC 42:1            | 0.97 | 1.38 | 0.922 |
| PG 34:3            | 0.76 | 1.10 | 0.922 |
| PS 42:6            | 1.00 | 1.40 | 0.925 |
| PI 34:2            | 1.19 | 0.82 | 0.931 |
| PC 40:0            | 1.05 | 1.41 | 0.941 |
| PC 40:6            | 1.18 | 0.82 | 0.941 |
| PC O-36:6          | 0.78 | 1.12 | 0.941 |
| PI O-38:4          | 0.71 | 0.75 | 0.941 |
| PE 42:2            | 1.36 | 1.00 | 0.958 |
| PC 38:2, PC O-40:9 | 0.75 | 1.01 | 0.959 |
| PC 36:4            | 1.40 | 1.17 | 0.967 |
| LPE 16:0           | 1.16 | 0.84 | 0.985 |
| LPE 18:3           | 1.36 | 1.22 | 0.986 |
| PA 38:4            | 1.30 | 1.28 | 0.986 |
| PC 34:6            | 1.33 | 1.13 | 0.986 |
| PC 38:5            | 0.83 | 0.75 | 0.986 |
| PC O-36:1          | 0.99 | 1.29 | 0.986 |
| PC O-42:9          | 1.00 | 1.28 | 0.986 |
| PE 36:4            | 0.75 | 0.85 | 0.986 |
| PE 38:4            | 0.94 | 1.23 | 0.986 |
| PE O-34:0          | 0.98 | 1.30 | 0.986 |
| PG 40:7, PG O-40:0 | 1.20 | 0.91 | 0.986 |
| PG 40:9, PG O-40:2 | 0.76 | 0.97 | 0.986 |
| PI 36:2            | 0.75 | 0.90 | 0.986 |
| PI 38:4            | 1.02 | 0.80 | 0.986 |
| PS 42:3            | 1.28 | 0.97 | 0.986 |
| PS 42:5            | 1.19 | 1.32 | 0.986 |
| PC 40:7, PC O-40:0 | 1.19 | 0.93 | 0.991 |
| PC 42:3            | 1.25 | 1.02 | 0.991 |
| PE 38:3            | 0.89 | 1.15 | 0.991 |
| PE 38:5            | 0.87 | 1.14 | 0.991 |
| PE O-36:4          | 0.84 | 1.07 | 0.991 |
| PS 32:0            | 0.88 | 0.78 | 0.991 |
| PS 38:7            | 1.28 | 1.04 | 0.991 |
| PA 36:5            | 0.83 | 0.84 | 0.992 |
| PA 38:5            | 0.94 | 0.81 | 0.992 |
| PC 34:3            | 1.05 | 0.88 | 0.992 |

|                    |      |      |       |
|--------------------|------|------|-------|
| PC 38:6            | 1.16 | 0.92 | 0.992 |
| PC 40:2            | 1.08 | 1.22 | 0.992 |
| PC 42:2            | 1.03 | 1.19 | 0.992 |
| PC 42:8, PC O-42:1 | 1.11 | 1.24 | 0.992 |
| PC O-34:0          | 0.84 | 1.03 | 0.992 |
| PG 42:9, PG O-42:2 | 0.89 | 0.83 | 0.992 |
| PS 40:0            | 1.00 | 1.21 | 0.992 |
| PS 40:1            | 0.85 | 0.99 | 0.992 |
| PS 40:3            | 1.15 | 0.91 | 0.992 |
| PS 42:8, PS O-42:1 | 1.22 | 1.09 | 0.992 |
| PS O-42:10         | 1.17 | 0.95 | 0.992 |
| PS O-42:7          | 0.98 | 1.17 | 0.992 |
| PS O-42:8          | 0.83 | 1.00 | 0.992 |
| PS 34:0, PS O-36:7 | 1.12 | 0.94 | 0.994 |
| LPC O-16:0         | 1.08 | 0.91 | 1.000 |
| PS 42:1            | 0.96 | 1.12 | 1.000 |
| PC 38:7            | 1.10 | 0.97 | 1.000 |
| PC 42:4            | 0.98 | 1.00 | 1.000 |
| PC 42:5            | 1.07 | 1.04 | 1.000 |
| PC O-36:2          | 1.09 | 1.11 | 1.000 |
| PG 36:3            | 0.95 | 1.01 | 1.000 |
| PG 38:4            | 0.86 | 0.90 | 1.000 |
| PG 38:6            | 1.14 | 1.08 | 1.000 |
| PG 38:7            | 0.96 | 0.91 | 1.000 |
| PG 40:8, PG O-40:1 | 0.92 | 0.97 | 1.000 |
| PS 36:0, PS O-38:7 | 1.01 | 1.00 | 1.000 |
| PS 36:1            | 0.95 | 0.95 | 1.000 |
| PS 38:1, PS O-40:8 | 0.96 | 0.91 | 1.000 |
| PS 38:2, PS O-40:9 | 1.03 | 1.04 | 1.000 |
| PS 40:2            | 0.90 | 0.88 | 1.000 |
| PS 42:4            | 1.14 | 1.01 | 1.000 |
| PS O-42:9          | 0.90 | 0.95 | 1.000 |

<sup>a</sup> Values are fold changes compared to the control group (NFCO).

<sup>b</sup>P values are analyzed by ANOVA across different groups and adjusted for FDR using MetaboAnalyst 5.0.

NF, normal fat; CO, no choline supplement; HF, high fat; CS, choline supplement. FDR: false discovery rate
