# Supplementary material for: Prenatal Choline Supplement in a Maternal Obesity Model Modulates Offspring Hepatic Lipidomes
Source: MDPI journal article supplement (doi:10.3390/nu15040965), 2023-02-15
Supplement: s1 [file s1]

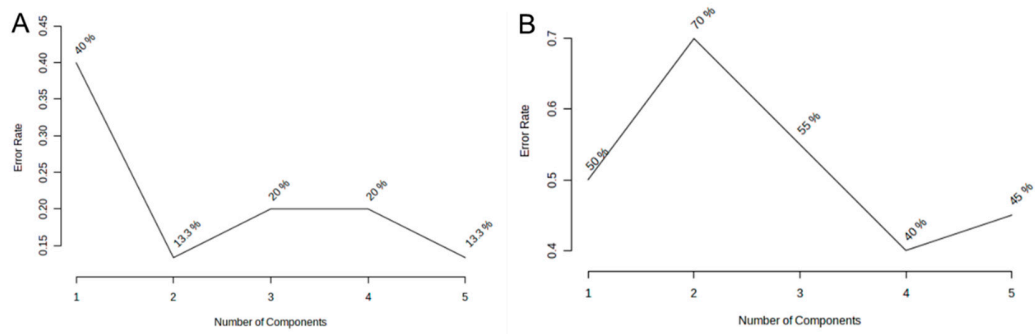

**Supplementary Figure S1.** Cross validation (CV) of Sparse partial least squares discriminant analysis (sPLS-DA) performance using 5-fold CV (A) at E17.5 and (B) after 6-week postweaning high-fat feeding of offspring.
