# Supplementary material for: Prenatal Choline Supplement in a Maternal Obesity Model Modulates Offspring Hepatic Lipidomes
Source: MDPI journal article supplement (doi:10.3390/nu15040965), 2023-02-15
Supplement: s1 [file s1]

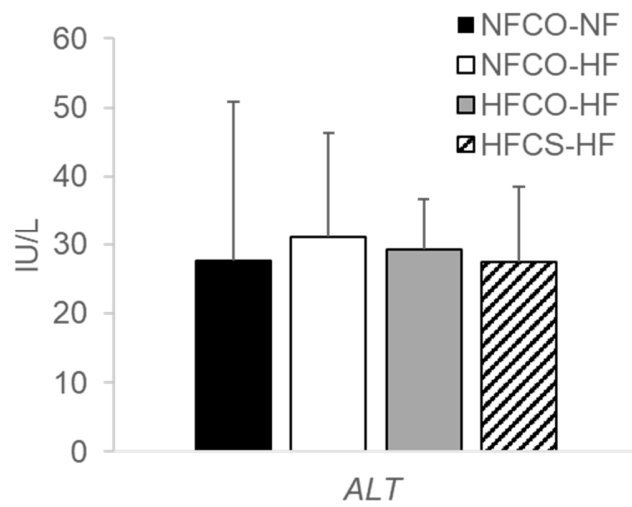

**Supplementary Figure S4.** Serum alanine transaminase (ALT) concentrations of male offspring mice after 6-week postweaning HF feeding. n = 6-10/group; Values represent means  $\pm$  SEM; analyzed with ANOVA and Post-hoc Fisher's LSD; no significant difference between groups. CO, untreated control without choline supplement; CS, choline supplemented; HF, high fat; NF, normal fat.
