# Supplementary material for: Prenatal Choline Supplement in a Maternal Obesity Model Modulates Offspring Hepatic Lipidomes
Source: MDPI journal article supplement (doi:10.3390/nu15040965), 2023-02-15
Supplement: s1 [file s1]

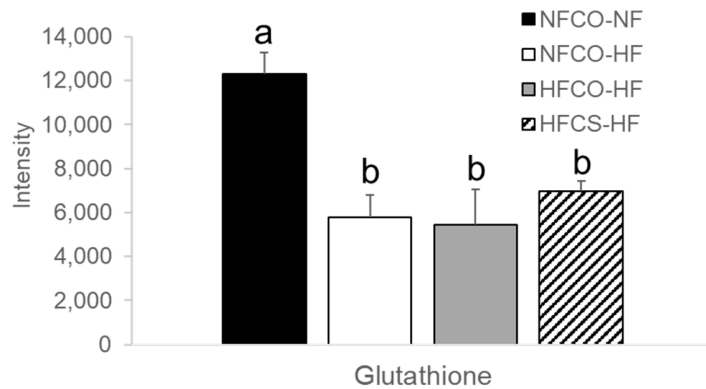

**Supplementary Figure S2.** Abundance of glutathione in the liver of male offspring mice after 6-week postweaning HF feeding. Glutathione was measured as one of the primary metabolites in the metabolomics panel using Gas chromatography Time-of-flight (GC-TOF) mass spectrometry (MS) at the West Coast Metabolomics Center (WCMC). Resulting peak intensities were normalized by tissue wet weight. n = 5-6/group; Values represent means  $\pm$  SEM; analyzed with ANOVA and Post-hoc Fisher's LSD; a,b, any two groups with no overlapping letters were significantly different in their pair-wise comparison. CO, untreated control without choline supplement; CS, choline supplemented; HF, high fat; NF, normal fat.
