# Supplementary material for: Prenatal Choline Supplement in a Maternal Obesity Model Modulates Offspring Hepatic Lipidomes
Source: MDPI journal article supplement (doi:10.3390/nu15040965), 2023-02-15
Supplement: s1 [file s1]

Supplemental Table S3. Abundance of lipid species in male offspring livers after 6-week post-weaning high-fat feeding.

| Lipid species                   | NFCO-HF <sup>a</sup> | HFCO-HF <sup>a</sup> | HFCS-HF <sup>a</sup> | FDR<br>adjusted <i>p</i><br>value <sup>b</sup> |
|---------------------------------|----------------------|----------------------|----------------------|------------------------------------------------|
| GlcCer d42:1                    | 0.24                 | 0.23                 | 0.44                 | 0.002                                          |
| GlcCer d42:2                    | 0.25                 | 0.22                 | 0.41                 | 0.002                                          |
| PG 40:6 PG 18:1_22:5            | 0.26                 | 0.23                 | 0.59                 | 0.002                                          |
| TG 56:4 TG 18:0_18:2_20:2       | 4.46                 | 3.96                 | 3.35                 | 0.002                                          |
| PE 38:7 PE 16:1_22:6            | 0.23                 | 0.31                 | 0.24                 | 0.002                                          |
| PG 36:2 PG 18:1_18:1            | 0.25                 | 0.23                 | 0.30                 | 0.002                                          |
| TG 56:8 Isomer A                | 4.20                 | 4.24                 | 2.78                 | 0.002                                          |
| PE 38:5 PE 18:0_20:5            | 0.28                 | 0.24                 | 0.65                 | 0.003                                          |
| FA 24:1 (nervonic acid)         | 0.24                 | 0.25                 | 0.45                 | 0.003                                          |
| PC 33:3;O PC 18:2_15:1;O        | 3.94                 | 3.46                 | 3.99                 | 0.003                                          |
| PE 38:7                         | 0.25                 | 0.30                 | 0.25                 | 0.004                                          |
| SM d37:1                        | 3.65                 | 4.26                 | 3.24                 | 0.004                                          |
| TG 58:10                        | 3.92                 | 4.21                 | 2.78                 | 0.004                                          |
| PE 36:5 PE 16:1_20:4            | 0.26                 | 0.26                 | 0.29                 | 0.004                                          |
| PE P-34:2 or PE O-34:3          | 0.28                 | 0.25                 | 0.57                 | 0.004                                          |
| TG 56:9                         | 4.06                 | 3.98                 | 2.82                 | 0.004                                          |
| CL 70:7 CL 16:1_18:2_18:2_18:2  | 0.27                 | 0.27                 | 0.27                 | 0.005                                          |
| GlcCer d41:1                    | 0.29                 | 0.28                 | 0.72                 | 0.006                                          |
| PE 34:3 PE 16:1_18:2            | 0.26                 | 0.27                 | 0.30                 | 0.007                                          |
| SM d36:0                        | 4.17                 | 3.37                 | 1.83                 | 0.007                                          |
| TG 54:7 Isomer A                | 3.85                 | 3.99                 | 2.33                 | 0.007                                          |
| PC 32:0                         | 0.37                 | 0.22                 | 0.56                 | 0.007                                          |
| PE 32:1 PE 16:0_16:1            | 0.27                 | 0.29                 | 0.27                 | 0.008                                          |
| TG 53:3;2O TG 16:0_18:2_19:1;2O | 3.75                 | 3.68                 | 1.75                 | 0.008                                          |
| LPC 16:1                        | 0.26                 | 0.31                 | 0.27                 | 0.008                                          |
| PC 30:0                         | 0.32                 | 0.23                 | 0.36                 | 0.008                                          |
| PI 38:5                         | 0.28                 | 0.26                 | 0.53                 | 0.008                                          |
| TG 56:8 Isomer B                | 3.77                 | 3.77                 | 1.93                 | 0.008                                          |
| CL 72:6 CL 18:1_18:2_18:1_18:2  | 0.25                 | 0.29                 | 0.35                 | 0.009                                          |
| PC 38:5 Isomer B                | 0.32                 | 0.25                 | 0.59                 | 0.009                                          |
| SM d42:2 Isomer A               | 0.31                 | 0.24                 | 0.48                 | 0.009                                          |
| TG 52:5                         | 3.66                 | 3.80                 | 1.95                 | 0.009                                          |
| TG 54:8                         | 3.68                 | 3.83                 | 2.86                 | 0.009                                          |
| PE O-38:6 PE O-16:1_22:5        | 0.38                 | 0.27                 | 0.85                 | 0.010                                          |
| PC 32:1                         | 0.31                 | 0.29                 | 0.27                 | 0.011                                          |
| PI 40:4                         | 0.33                 | 0.26                 | 0.29                 | 0.011                                          |

|                                 |      |      |      |       |
|---------------------------------|------|------|------|-------|
| TG 60:10 TG 18:0_20:4_22:6      | 3.79 | 3.66 | 2.18 | 0.011 |
| FA 14:1 (physeteric acid)       | 0.27 | 0.35 | 0.74 | 0.013 |
| PC 36:5 Isomer C                | 0.31 | 0.28 | 0.29 | 0.013 |
| PG 36:3 PG 18:1_18:2            | 0.26 | 0.30 | 0.51 | 0.013 |
| TG 54:6 TG 18:2_18:2_18:2       | 3.82 | 3.29 | 1.79 | 0.014 |
| TG 52:6                         | 3.74 | 3.53 | 2.08 | 0.014 |
| SM d38:1                        | 3.39 | 3.84 | 2.07 | 0.015 |
| TG 54:6 Isomer C                | 3.98 | 3.23 | 2.19 | 0.016 |
| PC 37:4                         | 3.24 | 2.79 | 3.86 | 0.017 |
| PE 40:5 PE 18:0_22:5            | 0.28 | 0.32 | 0.67 | 0.020 |
| CE 18:2                         | 2.81 | 3.49 | 3.52 | 0.021 |
| TG 56:7 Isomer A                | 3.93 | 3.12 | 2.17 | 0.021 |
| PC 36:3 Isomer A                | 0.26 | 0.31 | 0.38 | 0.021 |
| Cer d38:1                       | 2.60 | 4.20 | 2.25 | 0.021 |
| PC 38:4 Isomer C                | 3.15 | 3.04 | 3.65 | 0.021 |
| PG 38:4 PG 18:0_20:4            | 0.41 | 0.53 | 1.51 | 0.021 |
| PC 39:4                         | 2.63 | 2.52 | 4.13 | 0.021 |
| SM d42:2                        | 0.34 | 0.25 | 0.50 | 0.021 |
| PC 40:4 PC 20:0_20:4            | 3.28 | 3.18 | 3.37 | 0.022 |
| PC P-34:0 or PC O-34:1          | 0.34 | 0.26 | 0.58 | 0.022 |
| PE P-40:4 or PE O-40:5 Isomer A | 2.72 | 2.60 | 4.04 | 0.022 |
| SM d40:2 Isomer A               | 0.33 | 0.31 | 0.28 | 0.022 |
| TG 52:4                         | 3.44 | 3.08 | 1.47 | 0.022 |
| PC 31:0                         | 0.33 | 0.28 | 0.61 | 0.022 |
| PC 38:7                         | 0.37 | 0.37 | 0.25 | 0.022 |
| PC 39:6                         | 3.08 | 3.77 | 2.64 | 0.022 |
| PG 34:1 PG 16:0_18:1            | 0.29 | 0.33 | 0.32 | 0.022 |
| TG 54:7 TG 16:0_18:2_20:5       | 3.60 | 3.10 | 1.68 | 0.022 |
| TG 55:4;2O TG 18:1_18:2_19:1;2O | 3.50 | 3.39 | 1.88 | 0.022 |
| PC 36:5 PC 16:1_20:4            | 0.32 | 0.30 | 0.31 | 0.022 |
| PC 40:4 Isomer B                | 3.30 | 3.10 | 3.29 | 0.022 |
| TG 56:10                        | 3.20 | 3.71 | 2.39 | 0.022 |
| PC 34:3 Isomer A                | 0.32 | 0.43 | 0.27 | 0.024 |
| Cer d40:1                       | 2.37 | 4.03 | 1.73 | 0.024 |
| LPC 18:1                        | 0.28 | 0.30 | 0.44 | 0.024 |
| Cer 40:1;2O Cer 18:1;2O/22:0    | 2.40 | 4.01 | 1.76 | 0.025 |
| DG 36:4 Isomer A                | 2.61 | 3.93 | 2.58 | 0.025 |
| DG 36:5                         | 2.62 | 3.62 | 3.12 | 0.025 |
| PC 35:2                         | 2.97 | 3.55 | 2.98 | 0.025 |
| PE O-38:5 PE O-16:1_22:4        | 0.35 | 0.26 | 0.55 | 0.025 |
| TG 51:4                         | 3.60 | 2.93 | 1.65 | 0.025 |

|                                |      |      |      |       |
|--------------------------------|------|------|------|-------|
| PI 40:6 PI 18:0_22:6           | 0.50 | 0.66 | 0.25 | 0.026 |
| TG 55:5 TG 17:0_18:1_20:4      | 3.78 | 2.83 | 1.98 | 0.029 |
| TG 56:5 TG 18:0_18:1_20:4      | 3.64 | 2.94 | 1.82 | 0.029 |
| Cer 38:1;2O Cer 18:1;2O/20:0   | 2.25 | 4.02 | 1.91 | 0.030 |
| TG 54:6 TG 16:0_18:2_20:4      | 3.82 | 2.76 | 2.05 | 0.030 |
| TG 55:7 TG 15:0_18:1_22:6      | 3.72 | 2.90 | 2.00 | 0.030 |
| PE 36:4 Isomer B               | 0.27 | 0.37 | 0.36 | 0.030 |
| TG 53:5                        | 3.57 | 2.84 | 1.65 | 0.031 |
| Cer d40:2                      | 2.59 | 3.89 | 2.19 | 0.031 |
| PE O-40:5 PE O-18:1_22:4       | 2.54 | 2.22 | 3.91 | 0.031 |
| PE P-40:7 or PE O-40:8         | 0.33 | 0.30 | 0.34 | 0.032 |
| SM d38:2                       | 3.45 | 3.09 | 2.66 | 0.032 |
| TG 60:11                       | 3.52 | 3.09 | 2.13 | 0.033 |
| PE 40:8 PE 18:2_22:6           | 0.32 | 0.60 | 0.31 | 0.033 |
| SM d40:0                       | 2.50 | 2.70 | 0.96 | 0.033 |
| Cer 39:1;2O Cer 17:1;2O/22:0   | 2.67 | 3.75 | 2.44 | 0.034 |
| Cer d39:1                      | 2.57 | 3.74 | 2.54 | 0.035 |
| PI 36:3 PI 18:1_18:2           | 0.28 | 0.38 | 0.65 | 0.036 |
| PC 38:6 Isomer C               | 0.37 | 0.36 | 0.28 | 0.037 |
| TG 54:6 Isomer B               | 3.16 | 2.97 | 1.47 | 0.038 |
| Cer 40:2;2O Cer 18:2;2O/22:0   | 2.53 | 3.70 | 1.78 | 0.040 |
| PC 36:5 Isomer A_1             | 1.94 | 3.90 | 1.96 | 0.040 |
| PC 35:2 Isomer B               | 2.68 | 3.26 | 3.08 | 0.040 |
| PE P-38:4 or PE O-38:5         | 2.39 | 1.91 | 3.79 | 0.041 |
| PE 38:5 PE 18:1_20:4           | 0.29 | 0.41 | 0.73 | 0.042 |
| TG 58:10 TG 16:0_20:4_22:6     | 3.52 | 2.82 | 1.86 | 0.042 |
| PG 44:11 PG 22:5_22:6          | 0.37 | 0.41 | 1.04 | 0.043 |
| DMPE 32:0 DMPE 16:0_16:0       | 0.42 | 0.30 | 0.76 | 0.044 |
| PC 32:3                        | 0.31 | 0.34 | 0.36 | 0.044 |
| PE P-38:6 or PE O-38:7         | 0.39 | 0.28 | 0.37 | 0.044 |
| PC 38:5 Isomer B_1             | 0.41 | 0.29 | 0.71 | 0.046 |
| SM d40:1                       | 2.32 | 3.64 | 1.61 | 0.046 |
| CL 74:8 CL 36:4_38:4           | 1.16 | 3.21 | 2.19 | 0.047 |
| CL 74:8 CL 18:1_18:1_18:2_20:4 | 1.08 | 2.93 | 2.37 | 0.048 |
| PE 36:1                        | 0.33 | 0.36 | 0.32 | 0.048 |
| SM d42:2 Isomer B              | 0.34 | 0.32 | 0.62 | 0.048 |
| PC O-34:0                      | 0.80 | 0.89 | 2.60 | 0.049 |
| CL 72:8 CL 18:2_18:2_18:2_18:2 | 2.68 | 3.53 | 2.26 | 0.050 |
| PC 38:4 Isomer A               | 0.42 | 0.30 | 0.34 | 0.050 |
| LPC 16:0                       | 0.28 | 0.44 | 0.37 | 0.051 |
| PC 16:0/9:0 CHO                | 1.27 | 0.56 | 0.39 | 0.053 |

|                                 |      |      |      |       |
|---------------------------------|------|------|------|-------|
| TG 60:4                         | 3.23 | 3.03 | 2.05 | 0.053 |
| PE P-36:2 or PE O-36:3          | 0.43 | 0.61 | 1.45 | 0.053 |
| LPE 16:0                        | 0.27 | 0.46 | 0.48 | 0.054 |
| PG 38:6 PG 18:2_20:4            | 1.82 | 2.10 | 3.69 | 0.055 |
| LPI 20:4                        | 0.30 | 0.78 | 0.83 | 0.055 |
| PC 33:1                         | 0.35 | 0.36 | 0.33 | 0.058 |
| TG 60:12 TG 16:0_22:6_22:6      | 3.29 | 2.79 | 1.77 | 0.058 |
| PC P-38:4 or PC O-38:5 Isomer B | 2.45 | 1.78 | 3.51 | 0.058 |
| PC 36:3 Isomer B                | 0.42 | 0.38 | 0.29 | 0.059 |
| PE P-40:4 or PE O-40:5 Isomer B | 2.66 | 2.33 | 3.38 | 0.061 |
| SM d42:3                        | 0.60 | 0.33 | 1.03 | 0.062 |
| SM d43:1                        | 0.36 | 0.32 | 0.60 | 0.063 |
| PC P-38:5 or PC O-38:6 Isomer A | 0.30 | 0.39 | 0.38 | 0.064 |
| CoQ10                           | 0.31 | 0.35 | 0.51 | 0.068 |
| TG 56:9 TG 16:1_18:2_22:6       | 3.10 | 2.65 | 1.47 | 0.068 |
| TG 54:5 TG 18:1_18:2_18:2       | 3.12 | 2.61 | 1.50 | 0.073 |
| PC 34:1                         | 0.36 | 0.40 | 0.32 | 0.074 |
| DMPE 36:1 DMPE 18:0_18:1        | 0.32 | 0.35 | 0.47 | 0.077 |
| PC 36:5 Isomer B                | 0.41 | 0.35 | 0.33 | 0.077 |
| TG 53:4                         | 3.08 | 2.28 | 1.30 | 0.082 |
| PC 36:5 Isomer A                | 1.64 | 3.47 | 1.68 | 0.085 |
| PC 36:1                         | 0.34 | 0.34 | 0.47 | 0.090 |
| PG 36:2 PG 16:0_20:2            | 1.40 | 1.88 | 3.31 | 0.093 |
| LPC 20:1                        | 0.35 | 0.34 | 0.55 | 0.095 |
| LPC 20:3                        | 0.39 | 0.34 | 0.37 | 0.095 |
| PC 34:0                         | 1.88 | 1.15 | 3.02 | 0.095 |
| PC 40:5 Isomer B                | 0.41 | 0.34 | 0.76 | 0.095 |
| PE 38:5                         | 0.37 | 0.46 | 0.95 | 0.095 |
| PE 40:7 PE 18:1_22:6            | 0.31 | 0.58 | 0.40 | 0.095 |
| SM d39:1                        | 2.46 | 3.19 | 2.35 | 0.095 |
| TG 42:1                         | 0.40 | 0.41 | 0.32 | 0.095 |
| TG 54:5 Isomer A                | 3.07 | 2.40 | 1.45 | 0.095 |
| TG 58:3                         | 2.40 | 2.66 | 1.14 | 0.095 |
| PI 38:3 PI 18:0_20:3            | 0.55 | 0.51 | 0.29 | 0.095 |
| PC 32:2                         | 0.43 | 0.36 | 0.34 | 0.095 |
| DG 36:4 Isomer B                | 2.15 | 3.08 | 2.68 | 0.096 |
| PC 37:6                         | 2.28 | 3.15 | 1.49 | 0.098 |
| TG 54:5 Isomer B                | 3.04 | 2.32 | 1.39 | 0.098 |
| SM d40:2 Isomer B               | 2.42 | 3.20 | 1.73 | 0.099 |
| PC O-32:0                       | 0.41 | 0.34 | 0.71 | 0.101 |
| PE 36:4                         | 0.32 | 0.53 | 0.40 | 0.101 |

|                                 |      |      |      |       |
|---------------------------------|------|------|------|-------|
| PE 37:2 PE 19:0_18:2            | 1.96 | 2.65 | 3.07 | 0.101 |
| TG 51:3                         | 2.84 | 2.12 | 1.15 | 0.103 |
| TG O-52:1 TG O-18:0_16:0_18:1   | 1.34 | 2.07 | 3.09 | 0.106 |
| PG 38:5 PG 18:1_20:4            | 0.50 | 0.53 | 1.38 | 0.108 |
| LPE 18:1                        | 0.32 | 0.46 | 0.67 | 0.112 |
| DG 38:6                         | 2.12 | 2.77 | 2.87 | 0.116 |
| CL 72:7 CL 18:1_18:2_18:2_18:2  | 0.31 | 0.49 | 0.44 | 0.119 |
| PC 36:5 Isomer D                | 0.45 | 0.37 | 0.35 | 0.123 |
| PC P-38:3 or PC O-38:4 Isomer B | 2.78 | 2.39 | 2.70 | 0.123 |
| LPE 20:4                        | 0.31 | 0.57 | 0.55 | 0.125 |
| TG 52:3                         | 2.41 | 2.02 | 0.93 | 0.126 |
| PE P-40:4 or PE O-40:5          | 2.07 | 1.83 | 3.20 | 0.134 |
| SM d41:2 Isomer A               | 0.48 | 0.35 | 0.82 | 0.134 |
| TG 56:6                         | 2.93 | 2.26 | 1.42 | 0.134 |
| LPE 22:6                        | 0.31 | 0.65 | 0.60 | 0.136 |
| PC 36:2                         | 2.46 | 2.78 | 2.50 | 0.140 |
| PE 38:2 PE 20:0_18:2            | 2.18 | 2.93 | 2.46 | 0.141 |
| SM d36:1                        | 2.36 | 1.75 | 3.02 | 0.141 |
| PC 34:3 PC 16:0_18:3            | 1.80 | 2.50 | 2.91 | 0.143 |
| SM d41:2                        | 0.51 | 0.46 | 1.18 | 0.143 |
| TG 53:3                         | 2.71 | 1.90 | 1.09 | 0.143 |
| PI 39:4 PI 19:0_20:4            | 1.47 | 1.69 | 3.10 | 0.151 |
| PE 34:1_1                       | 0.34 | 0.41 | 0.57 | 0.152 |
| PC 38:4 Isomer B                | 0.57 | 0.33 | 0.75 | 0.152 |
| LPC 20:3_1                      | 0.36 | 0.46 | 0.38 | 0.152 |
| PC 40:7                         | 0.59 | 0.45 | 0.33 | 0.156 |
| PC 37:2                         | 2.13 | 2.21 | 2.99 | 0.157 |
| PI 37:4 PI 17:0_20:4            | 1.57 | 2.00 | 3.05 | 0.158 |
| TG 72:4 TG 18:1_36:1_18:2       | 2.98 | 2.27 | 1.95 | 0.160 |
| PE P-40:5 or PE O-40:6          | 2.45 | 1.89 | 2.86 | 0.163 |
| PC 42:5 Isomer A                | 2.78 | 1.72 | 1.13 | 0.164 |
| PE 36:3                         | 0.40 | 0.49 | 0.93 | 0.171 |
| TG O-50:1 TG O-16:0_16:0_18:1   | 0.42 | 0.43 | 0.36 | 0.171 |
| PC 33:0                         | 1.17 | 0.88 | 2.44 | 0.175 |
| PC 38:6 Isomer B                | 1.55 | 1.90 | 0.68 | 0.178 |
| TG 55:5 TG 18:1_18:2_19:2       | 2.79 | 2.01 | 1.32 | 0.189 |
| TG 56:7 Isomer B                | 2.46 | 2.39 | 1.29 | 0.195 |
| PC 38:6                         | 1.33 | 1.80 | 0.63 | 0.197 |
| PE 40:7                         | 0.36 | 0.75 | 0.52 | 0.198 |
| PC 40:6 Isomer A                | 1.74 | 1.45 | 2.94 | 0.198 |
| LPC 14:0                        | 0.43 | 0.40 | 0.40 | 0.200 |

|                              |      |      |      |       |
|------------------------------|------|------|------|-------|
| DG 40:8 DG 18:2_22:6         | 1.75 | 2.83 | 2.22 | 0.203 |
| PC 33:2                      | 1.97 | 2.95 | 1.80 | 0.203 |
| PE 37:4 PE 17:0_20:4         | 2.08 | 2.72 | 2.37 | 0.203 |
| FA 16:1 (palmitoleic acid)   | 0.36 | 0.45 | 0.48 | 0.207 |
| CAR 16:0                     | 2.30 | 2.10 | 2.72 | 0.209 |
| LPI 18:0                     | 0.42 | 1.12 | 0.92 | 0.209 |
| PC 42:6 Isomer B             | 2.46 | 2.54 | 1.51 | 0.209 |
| Cer 40:0;2O Cer 18:0;2O/22:0 | 2.12 | 2.50 | 1.20 | 0.211 |
| PC 41:6 PC 19:0_22:6         | 2.22 | 2.48 | 2.49 | 0.217 |
| PC 37:3                      | 0.49 | 0.35 | 0.52 | 0.221 |
| PC 42:7                      | 0.57 | 0.40 | 0.39 | 0.221 |
| PE 36:2                      | 1.87 | 2.73 | 2.27 | 0.224 |
| PG 36:4 PG 18:2_18:2         | 0.97 | 1.52 | 2.45 | 0.225 |
| TG 54:2 TG O-19:1_17:0_18:1  | 2.02 | 1.90 | 2.84 | 0.225 |
| LPC 18:3                     | 0.63 | 1.28 | 1.76 | 0.225 |
| TG 59:2                      | 1.13 | 0.82 | 0.43 | 0.230 |
| SM d34:0                     | 2.55 | 2.44 | 1.76 | 0.234 |
| PE P-36:4 or PE O-36:5       | 0.61 | 0.43 | 1.08 | 0.234 |
| PC 42:10                     | 0.80 | 0.56 | 0.37 | 0.238 |
| PE 39:6 PE 17:0_22:6         | 1.80 | 2.67 | 2.25 | 0.243 |
| TG 60:6                      | 2.68 | 2.20 | 1.98 | 0.243 |
| PC 34:3 Isomer C             | 1.62 | 2.28 | 2.61 | 0.243 |
| TG 56:5 Isomer B             | 2.66 | 1.94 | 1.33 | 0.243 |
| PC 38:5 Isomer A             | 0.53 | 0.37 | 0.73 | 0.251 |
| TG 46:2                      | 1.05 | 0.71 | 0.42 | 0.253 |
| TG 53:2                      | 2.13 | 1.36 | 0.81 | 0.266 |
| PC P-36:1 or PC O-36:2 A     | 1.32 | 1.56 | 2.71 | 0.267 |
| PC 42:10 PC 20:4_22:6        | 0.82 | 0.60 | 0.38 | 0.271 |
| TG 49:0                      | 1.71 | 0.84 | 0.63 | 0.273 |
| PC 35:2 Isomer A             | 0.40 | 0.44 | 0.62 | 0.276 |
| PC 40:7 Isomer A             | 0.66 | 0.45 | 0.40 | 0.277 |
| PC 37:5 Isomer B             | 1.01 | 0.56 | 1.53 | 0.281 |
| PE 34:1                      | 0.40 | 0.49 | 0.74 | 0.285 |
| PS 36:4                      | 0.47 | 0.46 | 0.40 | 0.287 |
| TG 50:4                      | 2.06 | 1.47 | 0.82 | 0.287 |
| PC P-40:3 or PC O-40:4       | 1.63 | 1.50 | 2.71 | 0.294 |
| TG 51:1                      | 2.22 | 1.39 | 0.89 | 0.296 |
| PC 40:8                      | 1.06 | 0.83 | 0.44 | 0.298 |
| SM d36:2                     | 1.28 | 0.88 | 2.21 | 0.301 |
| GlcCer d40:1                 | 0.40 | 0.55 | 0.46 | 0.302 |
| Cer 42:2;2O Cer 18:1;2O/24:1 | 0.39 | 0.49 | 0.53 | 0.302 |

|                              |      |      |      |       |
|------------------------------|------|------|------|-------|
| PI 40:4 PI 20:0_20:4         | 1.51 | 2.09 | 2.52 | 0.302 |
| TG 52:2 TG 16:0_18:1_18:1    | 1.36 | 1.14 | 0.54 | 0.306 |
| PC 38:2 PC 18:0_20:2         | 2.27 | 2.30 | 2.09 | 0.322 |
| LPC 22:6                     | 0.39 | 0.67 | 0.53 | 0.326 |
| PE 40:8                      | 0.54 | 1.16 | 0.55 | 0.326 |
| TG 49:1                      | 1.76 | 1.04 | 0.67 | 0.335 |
| TG 51:2                      | 1.86 | 1.33 | 0.74 | 0.340 |
| FA 14:0 (myristic acid)      | 0.42 | 0.49 | 0.72 | 0.346 |
| TG 53:1                      | 2.29 | 1.44 | 1.01 | 0.351 |
| PE P-36:1 or PE O-36:2       | 0.75 | 0.48 | 1.17 | 0.352 |
| PG 42:10 PG 20:4_22:6        | 1.34 | 1.81 | 2.47 | 0.352 |
| PC 36:6                      | 0.72 | 0.56 | 0.40 | 0.355 |
| FA 18:1 (oleic acid)         | 0.39 | 0.64 | 0.73 | 0.359 |
| LPC 20:0_1                   | 1.90 | 2.23 | 2.27 | 0.359 |
| PC 38:6 PC 18:2_20:4         | 2.34 | 1.54 | 2.14 | 0.359 |
| PC 42:5 Isomer B             | 0.71 | 0.39 | 0.62 | 0.359 |
| PE 40:6 PE 18:0_22:6         | 0.48 | 0.75 | 0.44 | 0.359 |
| TG 49:2                      | 1.81 | 1.19 | 0.72 | 0.359 |
| TG 51:0 TG 17:0_17:0_17:0    | 2.24 | 0.98 | 1.19 | 0.359 |
| TG 54:2                      | 1.62 | 0.88 | 0.64 | 0.359 |
| PS 36:4 PS 16:0_20:4         | 0.52 | 0.52 | 0.41 | 0.367 |
| PE 37:4                      | 1.59 | 2.24 | 2.25 | 0.368 |
| PE 38:3 PE 18:0_20:3         | 0.56 | 0.90 | 0.45 | 0.377 |
| PE 38:2                      | 1.81 | 2.38 | 2.02 | 0.383 |
| LPE 18:2                     | 0.44 | 0.83 | 0.96 | 0.384 |
| PE 38:6                      | 0.54 | 1.17 | 0.60 | 0.388 |
| FA 20:2 (eicosadienoic acid) | 0.90 | 1.29 | 2.08 | 0.392 |
| TG 54:1                      | 1.78 | 1.28 | 0.74 | 0.392 |
| TG 48:2                      | 0.85 | 0.57 | 0.44 | 0.392 |
| DG 34:2                      | 1.75 | 2.46 | 1.51 | 0.395 |
| PE 38:6 PE 18:2_20:4         | 0.99 | 1.26 | 2.19 | 0.395 |
| TG 46:1                      | 0.88 | 0.56 | 0.45 | 0.395 |
| TG 50:2                      | 1.21 | 0.85 | 0.51 | 0.395 |
| TG 56:3                      | 1.71 | 0.96 | 0.70 | 0.395 |
| PE 40:4 PE 18:0_22:4         | 0.94 | 1.17 | 2.12 | 0.402 |
| TG 49:3                      | 1.82 | 1.23 | 0.76 | 0.402 |
| Cer d34:0                    | 1.53 | 2.40 | 1.28 | 0.403 |
| LPC 20:4                     | 0.41 | 0.62 | 0.73 | 0.403 |
| TG 48:1                      | 0.97 | 0.64 | 0.46 | 0.403 |
| TG 56:5 Isomer A             | 2.21 | 1.73 | 1.14 | 0.403 |
| TG 58:6                      | 2.42 | 1.68 | 1.40 | 0.403 |

|                               |      |      |      |       |
|-------------------------------|------|------|------|-------|
| TG O-53:5 TG O-19:2_16:0_18:3 | 1.42 | 2.14 | 0.98 | 0.403 |
| LPC 22:6_1                    | 0.43 | 0.82 | 0.62 | 0.403 |
| TG 50:5                       | 2.25 | 1.71 | 1.17 | 0.404 |
| TG 52:1                       | 1.71 | 0.99 | 0.71 | 0.407 |
| PE 40:4 PE 20:0_20:4          | 1.38 | 2.36 | 1.76 | 0.410 |
| FA 18:3 (linolenic acid)      | 1.01 | 1.82 | 1.94 | 0.411 |
| PC 39:7                       | 1.68 | 1.23 | 0.70 | 0.411 |
| TG 55:1 TG 16:0_21:0_18:1     | 1.93 | 1.50 | 0.88 | 0.411 |
| PC 34:4                       | 0.68 | 0.41 | 0.67 | 0.415 |
| TG 50:3 Isomer A              | 1.48 | 1.05 | 0.62 | 0.421 |
| TG 54:4                       | 1.98 | 1.41 | 0.90 | 0.423 |
| FA 17:0 (margaric acid)       | 1.10 | 1.60 | 2.18 | 0.423 |
| FA 18:2 (linoleic acid)       | 1.14 | 1.94 | 2.00 | 0.423 |
| PC P-36:4 or PC O-36:5        | 1.03 | 0.86 | 1.94 | 0.423 |
| TG 55:4 TG 18:1_19:1_18:2     | 2.08 | 1.30 | 0.95 | 0.423 |
| TG 57:1                       | 1.10 | 0.87 | 0.50 | 0.423 |
| CAR 18:2                      | 2.01 | 2.05 | 2.05 | 0.427 |
| FA 22:2 (docosadienoic acid)  | 0.77 | 1.21 | 1.78 | 0.434 |
| PC 38:6 Isomer A              | 2.25 | 1.49 | 1.92 | 0.434 |
| PC 40:6 Isomer B              | 1.81 | 1.97 | 1.05 | 0.434 |
| TG 52:5 TG 16:1_18:2_18:2     | 1.66 | 1.50 | 0.78 | 0.434 |
| TG 54:3                       | 1.42 | 1.01 | 0.60 | 0.434 |
| TG 56:1                       | 1.28 | 1.10 | 0.57 | 0.434 |
| TG 56:2                       | 1.51 | 1.14 | 0.65 | 0.434 |
| PE 36:3 PE 18:1_18:2          | 0.62 | 0.82 | 1.44 | 0.434 |
| TG 50:1                       | 0.89 | 0.61 | 0.46 | 0.435 |
| PI 36:4 PI 16:0_20:4          | 0.43 | 0.58 | 0.64 | 0.441 |
| Cer d43:1                     | 0.58 | 0.51 | 0.99 | 0.444 |
| PC 38:2                       | 2.21 | 1.14 | 1.46 | 0.444 |
| TG 44:0                       | 0.82 | 0.48 | 0.53 | 0.444 |
| DG 36:3                       | 1.59 | 2.34 | 1.57 | 0.446 |
| PE 38:6 Isomer B              | 0.59 | 1.31 | 0.76 | 0.446 |
| TG 58:7 TG 18:1_18:1_22:5     | 2.24 | 1.72 | 1.33 | 0.449 |
| LPC 20:0                      | 1.87 | 2.17 | 1.89 | 0.449 |
| LPC 18:2                      | 0.43 | 0.66 | 0.72 | 0.452 |
| PE 40:4                       | 0.93 | 1.15 | 1.99 | 0.452 |
| PE 38:3                       | 0.62 | 0.95 | 0.49 | 0.457 |
| PG 40:8 PG 18:2_22:6          | 0.65 | 1.31 | 1.38 | 0.457 |
| SM d41:2 Isomer B             | 0.90 | 0.63 | 1.45 | 0.458 |
| TG 58:2                       | 1.29 | 1.07 | 0.58 | 0.458 |
| PC 40:7 Isomer B              | 0.72 | 0.57 | 0.45 | 0.460 |



|                                 |      |      |      |       |
|---------------------------------|------|------|------|-------|
| PC P-34:1 or PC O-34:2          | 1.01 | 0.70 | 1.60 | 0.468 |
| SM d42:1                        | 0.48 | 0.50 | 0.56 | 0.468 |
| TG 55:2                         | 1.81 | 1.18 | 0.82 | 0.468 |
| TG 58:1                         | 0.93 | 0.78 | 0.47 | 0.468 |
| TG 60:2 TG 24:0_18:1_18:1       | 1.01 | 0.73 | 0.49 | 0.468 |
| PC 39:6 PC 17:0_22:6            | 1.21 | 0.69 | 0.58 | 0.471 |
| PC 40:4 Isomer A                | 1.47 | 0.98 | 1.96 | 0.481 |
| GlcCer d38:1                    | 0.44 | 0.62 | 0.67 | 0.482 |
| LPC P-18:0 or LPC O-18:1        | 0.54 | 0.62 | 1.04 | 0.482 |
| Cer 22:4                        | 0.62 | 0.95 | 1.38 | 0.490 |
| Cer d33:1                       | 2.01 | 1.85 | 1.91 | 0.490 |
| DMPE 34:2 DMPE 16:0_18:2        | 1.09 | 1.91 | 0.93 | 0.490 |
| PC 40:4                         | 0.94 | 0.65 | 1.46 | 0.490 |
| PC P-40:6 or PC O-40:7 Isomer A | 0.46 | 0.59 | 0.59 | 0.490 |
| PE 38:4                         | 1.34 | 2.21 | 1.39 | 0.490 |
| PI 34:2 PI 16:0_18:2            | 1.58 | 2.22 | 1.43 | 0.490 |
| TG 46:0                         | 0.87 | 0.54 | 0.53 | 0.490 |
| TG 47:3;1O TG 16:0_18:2_13:1;1O | 0.94 | 0.70 | 0.49 | 0.492 |
| PC P-36:3 or PC O-36:4          | 0.62 | 0.52 | 0.98 | 0.492 |
| TG 55:3                         | 1.59 | 0.98 | 0.72 | 0.492 |
| FA 20:0 (arachidic acid)        | 0.70 | 1.32 | 1.44 | 0.494 |
| TG 58:4                         | 1.77 | 1.30 | 0.84 | 0.494 |
| FAHFA 32:0 FAHFA 16:0/16:0      | 0.47 | 0.62 | 0.79 | 0.496 |
| LPC 20:2                        | 0.81 | 0.60 | 1.28 | 0.496 |
| PE 42:6                         | 1.29 | 2.17 | 1.41 | 0.496 |
| PG 44:12 PG 22:6_22:6           | 0.48 | 0.89 | 0.79 | 0.496 |
| TG 44:1                         | 0.95 | 0.67 | 0.50 | 0.496 |
| TG 59:3                         | 1.80 | 1.42 | 0.89 | 0.496 |
| PG 34:2 PG 16:0_18:2            | 0.65 | 0.92 | 1.42 | 0.498 |
| TG 58:5                         | 2.03 | 1.49 | 1.11 | 0.503 |
| LPC 17:1                        | 0.52 | 0.70 | 0.50 | 0.504 |
| PE P-38:5 or PE O-38:6          | 0.77 | 0.62 | 1.30 | 0.507 |
| LPC 18:0_1                      | 0.99 | 1.05 | 1.91 | 0.513 |
| FA 20:1 (eicosenoic acid)       | 0.70 | 1.23 | 1.47 | 0.514 |
| Cer d41:1                       | 1.33 | 1.72 | 2.06 | 0.516 |
| PC 38:1                         | 0.54 | 0.50 | 0.60 | 0.516 |
| PC 38:3                         | 0.91 | 0.70 | 0.50 | 0.516 |
| PE 34:2                         | 0.50 | 0.85 | 0.62 | 0.516 |
| PI 38:6 PI 16:0_22:6            | 0.65 | 0.84 | 0.49 | 0.516 |
| TG 48:3                         | 1.10 | 0.69 | 0.56 | 0.516 |
| PE 36:4 Isomer A                | 0.52 | 0.93 | 0.97 | 0.516 |

|                                 |      |      |      |       |
|---------------------------------|------|------|------|-------|
| Cer 42:3;2O Cer 18:2;2O/24:1    | 0.56 | 0.61 | 0.97 | 0.535 |
| LPC 20:4_1                      | 0.53 | 0.83 | 1.02 | 0.535 |
| PC 35:4                         | 1.75 | 1.95 | 1.79 | 0.535 |
| PC P-38:4 or PC O-38:5 Isomer A | 0.68 | 0.69 | 1.27 | 0.535 |
| PC P-40:6 or PC O-40:7 Isomer B | 1.99 | 1.62 | 1.83 | 0.535 |
| PE 38:6 Isomer A                | 0.97 | 1.06 | 1.85 | 0.535 |
| PE 40:6                         | 0.91 | 1.68 | 0.86 | 0.535 |
| PS 38:2                         | 0.66 | 0.78 | 1.35 | 0.535 |
| SL 33:0;2O SL 17:0;O/16:0;O     | 0.50 | 0.58 | 0.57 | 0.535 |
| SM d34:1                        | 1.32 | 0.95 | 1.85 | 0.535 |
| TG 56:4                         | 1.78 | 1.34 | 0.91 | 0.535 |
| LPC 18:0                        | 1.06 | 1.07 | 1.91 | 0.537 |
| PC 34:3                         | 0.68 | 0.99 | 0.54 | 0.537 |
| PC 35:3                         | 1.35 | 2.06 | 1.24 | 0.537 |
| CAR 18:1                        | 1.56 | 1.51 | 2.07 | 0.550 |
| FA 20:3 (eicosatrienoic acid)   | 0.54 | 0.76 | 1.03 | 0.550 |
| TG 48:0 TG 16:0_16:0_16:0       | 0.84 | 0.55 | 0.56 | 0.554 |
| PE 40:6_1                       | 0.86 | 1.66 | 0.92 | 0.554 |
| PC 34:2                         | 1.09 | 1.77 | 0.91 | 0.560 |
| PE 34:3                         | 0.88 | 1.33 | 1.71 | 0.560 |
| TG O-52:2 TG O-18:1_16:0_18:1   | 0.65 | 0.59 | 1.05 | 0.560 |
| TG 62:3                         | 1.25 | 0.76 | 0.65 | 0.570 |
| TG 57:3 TG 21:0_18:1_18:2       | 1.50 | 1.09 | 0.74 | 0.572 |
| TG 57:2 TG 23:0_16:1_18:1       | 1.45 | 1.15 | 0.73 | 0.573 |
| TG 60:3                         | 1.14 | 0.81 | 0.59 | 0.578 |
| DG 34:3                         | 0.64 | 0.75 | 0.51 | 0.588 |
| SM d33:1                        | 1.07 | 0.66 | 1.31 | 0.591 |
| PE 38:1 PE 18:0_20:1            | 1.12 | 1.90 | 1.42 | 0.595 |
| TG 52:0                         | 1.88 | 1.13 | 1.10 | 0.595 |
| PI 38:4 PI 18:0_20:4            | 0.51 | 0.79 | 0.67 | 0.597 |
| PC 40:3                         | 1.06 | 0.94 | 0.57 | 0.597 |
| PE 38:4 Isomer B                | 1.14 | 1.87 | 1.09 | 0.598 |
| PE 40:7 PE 20:3_20:4            | 0.70 | 0.78 | 0.51 | 0.600 |
| TG 62:2                         | 0.99 | 0.67 | 0.58 | 0.610 |
| SM d41:1                        | 0.96 | 1.03 | 1.72 | 0.628 |
| CE 20:4                         | 0.95 | 0.92 | 1.64 | 0.630 |
| Cer d36:1                       | 1.35 | 1.65 | 1.85 | 0.635 |
| Cer 34:1;2O Cer 18:1;2O/16:0    | 1.51 | 1.81 | 1.70 | 0.645 |
| TG 62:4                         | 1.18 | 0.95 | 0.63 | 0.658 |
| PE P-34:1 or PE O-34:2          | 1.53 | 0.83 | 0.98 | 0.659 |
| CE 22:2                         | 0.84 | 0.89 | 1.50 | 0.661 |

|                                 |      |      |      |       |
|---------------------------------|------|------|------|-------|
| FA 22:0 (behenic acid)          | 0.55 | 0.87 | 0.75 | 0.681 |
| LPE 18:0                        | 0.54 | 0.78 | 0.79 | 0.692 |
| LPE 18:0_1                      | 0.55 | 0.79 | 0.83 | 0.692 |
| TG 60:5                         | 1.74 | 1.20 | 1.05 | 0.692 |
| TG 48:4 Isomer B                | 1.78 | 1.19 | 1.13 | 0.694 |
| DG 38:5                         | 1.51 | 1.69 | 1.69 | 0.696 |
| LPC 15:0                        | 0.64 | 0.87 | 1.14 | 0.707 |
| DG 36:2                         | 0.63 | 0.73 | 0.58 | 0.719 |
| FA 20:5 (eicosapentaenoic acid) | 1.10 | 1.74 | 1.20 | 0.719 |
| PE 34:3 PE 16:0_18:3            | 1.00 | 1.45 | 1.57 | 0.719 |
| PE 36:4 PE 18:2_18:2            | 0.80 | 1.41 | 1.19 | 0.719 |
| PE 40:5                         | 0.61 | 1.03 | 0.85 | 0.719 |
| FA 22:6 (docosahexaenoic acid)  | 0.71 | 1.18 | 1.19 | 0.721 |
| PE 37:5 PE 17:1_20:4            | 1.00 | 1.01 | 1.62 | 0.721 |
| CE 22:6                         | 1.41 | 1.48 | 1.76 | 0.728 |
| PS 38:4                         | 1.35 | 1.70 | 1.59 | 0.728 |
| SM d32:1                        | 1.13 | 0.79 | 1.36 | 0.746 |
| TG 46:3 Isomer A                | 0.66 | 0.59 | 0.70 | 0.749 |
| PC 42:8                         | 1.60 | 1.53 | 1.59 | 0.753 |
| CE 22:5                         | 0.69 | 0.70 | 1.05 | 0.760 |
| PC 34:3 Isomer B                | 0.87 | 1.15 | 0.69 | 0.772 |
| SM d34:2                        | 0.61 | 0.65 | 0.76 | 0.774 |
| PE 35:2 PE 17:0_18:2            | 1.11 | 1.56 | 1.49 | 0.778 |
| Cer d34:1                       | 1.43 | 1.67 | 1.38 | 0.785 |
| FA 20:4 (arachidonic acid)      | 0.76 | 1.10 | 1.27 | 0.786 |
| PC P-32:0 or PC O-32:1          | 0.64 | 0.64 | 0.70 | 0.786 |
| PS 40:6 PS 18:0_22:6            | 1.24 | 1.58 | 1.51 | 0.796 |
| PC 33:2_1                       | 0.90 | 1.44 | 1.07 | 0.808 |
| PC 36:4 Isomer A                | 1.23 | 1.58 | 1.08 | 0.818 |
| CE 22:3                         | 0.89 | 1.16 | 1.40 | 0.826 |
| PC 37:5 Isomer A                | 1.37 | 0.91 | 1.28 | 0.828 |
| DG 34:1                         | 0.77 | 0.80 | 0.63 | 0.841 |
| TG 60:8 TG 18:1_18:1_24:6       | 1.53 | 1.15 | 1.39 | 0.841 |
| DG 36:1                         | 0.77 | 1.01 | 1.21 | 0.847 |
| Cer d42:2 Isomer A              | 0.74 | 1.04 | 1.07 | 0.881 |
| PC 39:5                         | 1.11 | 1.05 | 1.47 | 0.881 |
| PC 42:6 Isomer A                | 0.68 | 0.72 | 0.74 | 0.881 |
| SM 34:2,3O                      | 0.98 | 1.03 | 1.41 | 0.881 |
| Cer 42:1;2O Cer 18:1;2O/24:0    | 0.92 | 1.34 | 1.09 | 0.904 |
| PC 40:5 Isomer A                | 1.32 | 0.94 | 1.11 | 0.928 |
| CoQ9                            | 0.92 | 1.15 | 1.28 | 0.928 |

|                             |      |      |      |       |
|-----------------------------|------|------|------|-------|
| PC 35:1                     | 0.86 | 0.90 | 1.17 | 0.947 |
| Cer d42:2 Isomer B          | 0.76 | 0.95 | 1.02 | 0.948 |
| Cer d32:1                   | 1.21 | 0.88 | 1.05 | 0.952 |
| PE P-40:6 or PE O-40:7      | 1.18 | 0.93 | 1.20 | 0.956 |
| PC P-40:5 or PC O-40:6      | 0.97 | 1.12 | 1.26 | 0.962 |
| PS 38:6 PS 16:0_22:6        | 0.94 | 1.08 | 0.82 | 0.962 |
| Cer d34:2                   | 1.08 | 1.31 | 1.08 | 0.966 |
| Cer d42:1                   | 0.84 | 1.08 | 0.97 | 0.973 |
| FA 15:0 (pentadecylic acid) | 0.95 | 1.19 | 1.02 | 0.973 |
| PC 36:4 Isomer C            | 1.01 | 1.24 | 1.13 | 0.973 |
| PE 38:4 Isomer A            | 0.78 | 0.89 | 0.88 | 0.973 |
| TG 46:3 Isomer B            | 1.11 | 1.01 | 1.23 | 0.973 |
| CE 20:3                     | 0.89 | 0.85 | 0.90 | 0.993 |
| Cholesterol                 | 0.87 | 0.90 | 0.91 | 0.994 |
| PC 36:4 Isomer B            | 1.06 | 1.03 | 1.03 | 1.000 |

<sup>a</sup>Values are fold changes compared to the absolute control group that received normal-fat diets both prenatally and postnatally (NFCO-NF).

<sup>b</sup>P values are analyzed by ANOVA across different groups and adjusted for FDR using MetaboAnalyst 5.0.

NF, normal fat; CO, no choline supplement; HF, high fat; CS, choline supplement. FDR: false discovery rate
