# Supplementary material for: Prenatal Choline Supplement in a Maternal Obesity Model Modulates Offspring Hepatic Lipidomes
Source: MDPI journal article supplement (doi:10.3390/nu15040965), 2023-02-15
Supplement: s1 [file s1]

**Supplementary Table S1.** Primers used for real-time PCR<sup>1</sup>

| Gene Symbol   | Forward Primer               | Reverse Primer               |
|---------------|------------------------------|------------------------------|
| <i>Acer2</i>  | 5' ACAACGTGCTTGGCGTTTAT 3'   | 5' CGCACATTGTCACACCTCTT 3'   |
| <i>Actb</i>   | 5' TAAGGCCAACCGTGAAAAGA 3'   | 5' TGCCTGTGGTACGACCAGAG 3'   |
| <i>Agps</i>   | 5' ACGGTCAGAGGGGTATTGCT 3'   | 5' AGATCTATAACCCTGTCCCAAG 3' |
| <i>Ccl2</i>   | 5' ACCTGCTGCTACTCATTAC 3'    | 5' GAGCTTGGTGACAAAACTACAG 3' |
| <i>Cers2</i>  | 5' AGATGGACGTGTCTATGCCA 3'   | 5' GGTGTTGCCACATAAAGCTC 3'   |
| <i>Col1a1</i> | 5' CATGGCCAAGAAGACATCCC 3'   | 5' CAGATCAAGCATACCTCGGG 3'   |
| <i>Cybb</i>   | 5' TTGCTGTGCACCATGATGAG 3'   | 5' CGCCTATTGTGGTGTAGGG 3'    |
| <i>Elovl1</i> | 5' TGAGCTGATGGACACAGTGAT 3'  | 5' TTTTATCCCCCACCACCAACT 3'  |
| <i>Fads2</i>  | 5' GCAGCCCCTTGAGTATGGCAAG 3' | 5' AGTACATAGGGATGAGCAGCGG 3' |
| <i>Far1</i>   | 5' TTGAATGAAGAGATGTCTGGCC 3' | 5' GCGCCAGATAAGTATCACAAGG 3' |
| <i>Gnpat</i>  | 5' AGATCCTCGGAGTTCCTAAGCC 3' | 5' AACGCAGTGATACAGGGTCTCC 3' |
| <i>Gpx4</i>   | 5' TCTGTGTAAATGGGGACGATG 3'  | 5' ACGCAGCCGTTCTTATCAAT 3'   |
| <i>Mfsd2a</i> | 5' ACCCGGTTTGGCAAGAAGACAG 3' | 5' GGCCACCACGTAAGTGACGATT 3' |
| <i>Sod</i>    | 5' CAGAAAACACGGTGGGCCAAAG 3' | 5' TGCAATGGTCTCCTGAGAGTGA 3' |
| <i>Tnfa</i>   | 5' AGAAGTTCCCAAATGGCCTCCC 3' | 5' CGTTGGCCAGGAGGGCGTT 3'    |

<sup>1</sup>Abbreviations: *Acer2* (alkaline ceramidase 2), *Actb* (beta-actin), *Agps* (peroxisomal alkyl dihydroxyacetone phosphate synthase), *Ccl2* [MCP-1/chemokine (C-C motif) ligand 2], *Cers2* (ceramide synthase 2), *Col1a1* (COL1A1 collagen type I alpha 1 chain), *Cybb* (cytochrome b-245 beta), *Elovl1* (elongation of very long chain fatty acids 1), *Fads2* (fatty acid desaturase 2), *Far1* (fatty acyl-CoA reductase 1), *Gnpat* (glycerone phosphate O-acyltransferase), *Gpx4* (glutathione peroxidase 4), *Mfsd2a* (mammalian family super domain 2 a), *Sod* (superoxide dismutase), *Tnfa* (tumor necrosis factor alpha).
